# Supplementary material for: Sample composition alters associations between age and brain structure
Source: PubMed Central journal article supplement (PMC5638928; doi:10.1038/s41467-017-00908-7), 2017-10-12
Supplement: 41467_2017_908_MOESM1_ESM.pdf [file 41467_2017_908_MOESM1_ESM.pdf]

## Supplementary Information

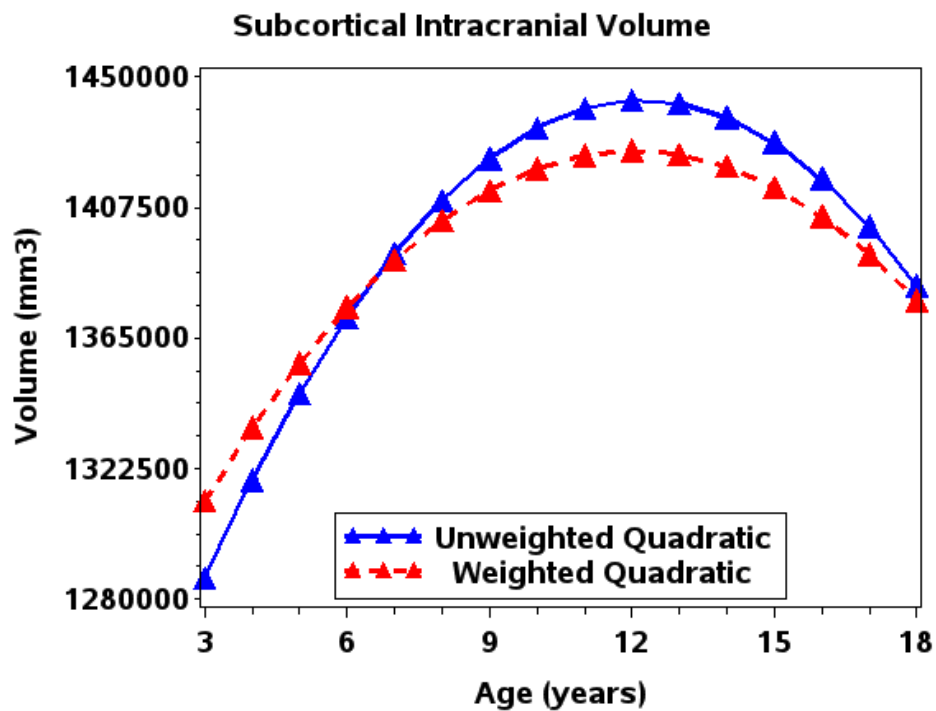

Supplementary Figure 1: Age-related variation in intracranial volume in the unweighted and weighted samples. Using the best-fitting regression models described in Supplementary Table 6, we calculated the predicted values by age for subcortical intracranial volume in the unweighted (blue lines) and weighted (red lines) samples.

Supplementary Table 1. Brain regions included in lobe specific analyses. The individual cortical surface area and thickness regions included in each lobe specific analysis (frontal, parietal, temporal and occipital) as identified in the Desikan-Killiany atlas.

| <b>Lobe</b>    | <b>Individual Regions Included</b>                                                                                                                                                                                                       |
|----------------|------------------------------------------------------------------------------------------------------------------------------------------------------------------------------------------------------------------------------------------|
| Frontal Lobe   | Superior Frontal<br>Rostral and Caudal Middle Frontal<br>Pars Opercularis<br>Pars Triangularis<br>Pars Orbitalis<br>Lateral and Medial Orbitofrontal<br>Precentral<br>Paracentral<br>Frontal Pole<br>Rostral Anterior<br>Caudal Anterior |
| Parietal Lobe  | Superior Parietal<br>Inferior Parietal<br>Supramarginal<br>Postcentral<br>Precuneus<br>Posterior<br>Isthmus                                                                                                                              |
| Temporal Lobe  | Superior, Middle, and Inferior Temporal<br>Banks of the Superior Temporal Sulcus<br>Fusiform<br>Transverse Temporal<br>Entorhinal<br>Temporal Pole<br>Parahippocampal                                                                    |
| Occipital Lobe | Lateral Occipital<br>Lingual<br>Cuneus<br>Pericalcarine                                                                                                                                                                                  |

Supplementary Table 2. Best fitting models for hemispheric, global measures of brain structure. Beta estimates, standard errors (SE), and AIC fit statistics for linear, quadratic, and cubic models of age for left and right hemispheric cortical volume, mean cortical thickness, and cortical surface area in both the unweighted and weighted PING data. The AIC of the best fitting model for each outcome is in bold.

|                                   |                  |                   | Unweighted PING Data |                   | Weighted PING Data |                |
|-----------------------------------|------------------|-------------------|----------------------|-------------------|--------------------|----------------|
|                                   |                  |                   | Beta (SE)            | AIC               | Beta (SE)          | AIC            |
| Left Total Cortical Volume        | Linear           | Age               | -3018.1 (137.81)     | 22772.64          | -3230.21 (141.95)  | 23689.76       |
|                                   | Quadratic        | Age               | -2913.68 (140.63)    | <b>22763.68</b>   | -3183.88 (141.84)  | 23680.61       |
|                                   |                  | Age <sup>2</sup>  | -114.28 (34.42)      |                   | -118.32 (35.34)    |                |
| Cubic                             | Age              | -3161.03 (311.95) | 22764.89             | -4005.11 (324.3)  | <b>23674.73</b>    |                |
|                                   | Age <sup>2</sup> | -120.6 (35.13)    |                      | -126.81 (35.33)   |                    |                |
|                                   | Age <sup>3</sup> | 7.54 (8.49)       |                      | 24.73 (8.79)      |                    |                |
| Right Total Cortical Volume       | Linear           | Age               | -3033.88 (139.1)     | 22791.57          | -3291.08 (144.65)  | 23728.12       |
|                                   | Quadratic        | Age               | -2919.12 (141.8)     | <b>22780.55</b>   | -3236.18 (144.27)  | 23715.02       |
|                                   |                  | Age <sup>2</sup>  | -125.59 (34.71)      |                   | -140.21 (35.94)    |                |
| Cubic                             | Age              | -3198.6 (314.52)  | 22781.56             | -4012.32 (330.02) | <b>23710.21</b>    |                |
|                                   | Age <sup>2</sup> | -132.74 (35.42)   |                      | -148.22 (35.95)   |                    |                |
|                                   | Age <sup>3</sup> | 8.53 (8.56)       |                      | 23.37 (8.95)      |                    |                |
| Left Total Thickness              | Linear           | Age               | -0.029 (8.0E-4)      | -1699.38          | -0.03 (8.0E-4)     | <b>-782.32</b> |
|                                   | Quadratic        | Age               | -0.029 (8.0E-4)      | -1702.62          | -0.03 (8.0E-4)     | -780.44        |
|                                   |                  | Age <sup>2</sup>  | 0.001 (2.0E-4)       |                   | 0 (2.0E-4)         |                |
| Cubic                             | Age              | -0.025 (1.8E-3)   | <b>-1705.80</b>      | -0.026 (1.9E-3)   | -783.10            |                |
|                                   | Age <sup>2</sup> | 0.001 (2.0E-4)    |                      | 0 (2.0E-4)        |                    |                |
|                                   | Age <sup>3</sup> | 0 (0.0E+0)        |                      | 0 (1.0E-4)        |                    |                |
| Right Total Thickness             | Linear           | Age               | -0.029 (8.0E-4)      | -1634.83          | -0.031 (8.0E-4)    | -741.40        |
|                                   | Quadratic        | Age               | -0.03 (8.0E-4)       | -1640.64          | -0.031 (8.0E-4)    | -739.60        |
|                                   |                  | Age <sup>2</sup>  | 0.001 (2.0E-4)       |                   | 0 (2.0E-4)         |                |
| Cubic                             | Age              | -0.026 (1.9E-3)   | <b>-1643.47</b>      | -0.026 (1.9E-3)   | <b>-743.97</b>     |                |
|                                   | Age <sup>2</sup> | 0.001 (2.0E-4)    |                      | 0 (2.0E-4)        |                    |                |
|                                   | Age <sup>3</sup> | 0 (1.0E-4)        |                      | 0 (1.0E-4)        |                    |                |
| Left Total Cortical Surface Area  | Linear           | Age               | 303.19 (66.01)       | 21287.43          | 185.84 (66.39)     | 22148.75       |
|                                   | Quadratic        | Age               | 405.6 (65.66)        | <b>21234.33</b>   | 220.06 (65.6)      | 22118.08       |
|                                   |                  | Age <sup>2</sup>  | -120.61 (16.03)      |                   | -93.77 (16.28)     |                |
| Cubic                             | Age              | 134.14 (146.54)   | 21232.05             | -305.06 (149.82)  | <b>22105.05</b>    |                |
|                                   | Age <sup>2</sup> | -127.5 (16.34)    |                      | -98.97 (16.21)    |                    |                |
|                                   | Age <sup>3</sup> | 8.28 (4)          |                      | 15.8 (4.06)       |                    |                |
| Right Total Cortical Surface Area | Linear           | Age               | 296.91 (67.07)       | 21319.90          | 189.39 (67.45)     | 22180.92       |
|                                   | Quadratic        | Age               | 400.53 (66.74)       | <b>21267.28</b>   | 223.5 (66.69)      | 22151.49       |
|                                   |                  | Age <sup>2</sup>  | -122.03 (16.29)      |                   | -93.48 (16.55)     |                |
| Cubic                             | Age              | 136.8 (148.96)    | 21265.37             | -303.93 (152.33)  | <b>22138.82</b>    |                |
|                                   | Age <sup>2</sup> | -128.73 (16.61)   |                      | -98.7 (16.48)     |                    |                |
|                                   | Age <sup>3</sup> | 8.04 (4.06)       |                      | 15.87 (4.13)      |                    |                |

Supplementary Table 3. Best fitting models for lobe specific cortical thickness. Beta estimates, standard errors (SE), and AIC fit statistics for linear, quadratic, and cubic models of age for left and right frontal, occipital, temporal, and parietal lobe thickness in both the unweighted and weighted PING data. The AIC of the best fitting model for each outcome is in bold.

|                                |                  |                  | Unweighted PING Data |                 | Weighted PING Data |                |
|--------------------------------|------------------|------------------|----------------------|-----------------|--------------------|----------------|
|                                |                  |                  | Beta (SE)            | AIC             | Beta (SE)          | AIC            |
| Left Frontal Lobe Thickness    | Linear           | Age              | -0.034 (1.0E-3)      | -1323.84        | -0.035 (1.0E-3)    | -358.81        |
|                                | Quadratic        | Age              | -0.035 (1.0E-3)      | -1340.85        | -0.035 (1.0E-3)    | -368.81        |
|                                |                  | Age <sup>2</sup> | 0.001 (2.0E-4)       |                 | 0.001 (3.0E-4)     |                |
| Cubic                          | Age              | -0.029 (2.2E-3)  | <b>-1347.18</b>      | -0.029 (2.3E-3) | <b>-376.14</b>     |                |
|                                | Age <sup>2</sup> | 0.001 (2.0E-4)   |                      | 0.001 (3.0E-4)  |                    |                |
|                                | Age <sup>3</sup> | 0 (1.0E-4)       |                      | 0 (1.0E-4)      |                    |                |
| Right Frontal Lobe Thickness   | Linear           | Age              | -0.033 (1.0E-3)      | -1176.03        | -0.035 (1.0E-3)    | -316.74        |
|                                | Quadratic        | Age              | -0.034 (1.0E-3)      | <b>-1188.79</b> | -0.035 (1.0E-3)    | <b>-320.04</b> |
|                                |                  | Age <sup>2</sup> | 0.001 (3.0E-4)       |                 | 0.001 (3.0E-4)     |                |
| Cubic                          | Age              | -0.031 (2.3E-3)  | -1189.32             | -0.032 (2.4E-3) | -320.38            |                |
|                                | Age <sup>2</sup> | 0.001 (3.0E-4)   |                      | 0.001 (3.0E-4)  |                    |                |
|                                | Age <sup>3</sup> | 0 (1.0E-4)       |                      | 0 (1.0E-4)      |                    |                |
| Left Occipital Lobe Thickness  | Linear           | Age              | -0.115 (4.0E-3)      | 1585.00         | -0.116 (4.1E-3)    | 2481.75        |
|                                | Quadratic        | Age              | -0.12 (4.0E-3)       | 1549.63         | -0.118 (4.1E-3)    | <b>2458.34</b> |
|                                |                  | Age <sup>2</sup> | 0.006 (1.0E-3)       |                 | 0.005 (1.0E-3)     |                |
| Cubic                          | Age              | -0.099 (9.0E-3)  | <b>1545.08</b>       | -0.115 (9.4E-3) | 2460.22            |                |
|                                | Age <sup>2</sup> | 0.007 (1.0E-3)   |                      | 0.005 (1.0E-3)  |                    |                |
|                                | Age <sup>3</sup> | -0.001 (2.0E-4)  |                      | 0 (3.0E-4)      |                    |                |
| Right Occipital Lobe Thickness | Linear           | Age              | -0.119 (3.7E-3)      | 1437.02         | -0.128 (3.8E-3)    | 2302.28        |
|                                | Quadratic        | Age              | -0.125 (3.7E-3)      | 1379.06         | -0.13 (3.7E-3)     | <b>2279.90</b> |
|                                |                  | Age <sup>2</sup> | 0.007 (9.0E-4)       |                 | 0.005 (9.0E-4)     |                |
| Cubic                          | Age              | -0.1 (8.3E-3)    | <b>1369.26</b>       | -0.117 (8.6E-3) | 2278.95            |                |
|                                | Age <sup>2</sup> | 0.008 (9.0E-4)   |                      | 0.005 (9.0E-4)  |                    |                |
|                                | Age <sup>3</sup> | -0.001 (2.0E-4)  |                      | 0 (2.0E-4)      |                    |                |
| Left Temporal Lobe Thickness   | Linear           | Age              | -0.02 (1.1E-3)       | <b>-972.49</b>  | -0.019 (1.1E-3)    | <b>-125.05</b> |
|                                | Quadratic        | Age              | -0.02 (1.2E-3)       | -970.84         | -0.019 (1.1E-3)    | -123.42        |
|                                |                  | Age <sup>2</sup> | 0 (3.0E-4)           |                 | 0 (3.0E-4)         |                |
| Cubic                          | Age              | 0.02 (2.6E-3)    | -968.92              | -0.019 (2.6E-3) | -121.42            |                |
|                                | Age <sup>2</sup> | 0 (3.0E-4)       |                      | 0 (3.0E-4)      |                    |                |
|                                | Age <sup>3</sup> | 0 (1.0E-4)       |                      | 0 (1.0E-4)      |                    |                |
| Right Temporal Lobe Thickness  | Linear           | Age              | -0.018 (1.1E-3)      | <b>-1103.58</b> | -0.019 (1.1E-3)    | <b>-208.97</b> |
|                                | Quadratic        | Age              | -0.018 (1.1E-3)      | -1102.35        | -0.019 (1.1E-3)    | -211.37        |
|                                |                  | Age <sup>2</sup> | 0 (3.0E-4)           |                 | -0.001 (3.0E-4)    |                |
| Cubic                          | Age              | -0.015 (2.4E-3)  | -1103.20             | -0.016 (2.5E-3) | -211.37            |                |
|                                | Age <sup>2</sup> | 0 (3.0E-4)       |                      | -0.001 (3.0E-4) |                    |                |
|                                | Age <sup>3</sup> | 0 (1.0E-4)       |                      | 0 (1.0E-4)      |                    |                |
| Left Parietal Lobe Thickness   | Linear           | Age              | -0.031 (8.0E-4)      | <b>-1629.68</b> | -0.033 (9.0E-4)    | <b>-680.48</b> |
|                                | Quadratic        | Age              | -0.031 (8.0E-4)      | -1630.29        | -0.033 (9.0E-4)    | -679.67        |
|                                |                  | Age <sup>2</sup> | 0 (2.0E-4)           |                 | 0 (2.0E-4)         |                |
| Cubic                          | Age              | -0.028 (1.9E-3)  | -1630.89             | -0.032 (2.0E-3) | -677.78            |                |
|                                | Age <sup>2</sup> | 0 (2.0E-4)       |                      | 0 (2.0E-4)      |                    |                |
|                                | Age <sup>3</sup> | 0 (1.0E-4)       |                      | 0 (1.0E-4)      |                    |                |
| Right Parietal Lobe Thickness  | Linear           | Age              | -0.031 (9.0E-4)      | -1562.38        | -0.033 (9.0E-4)    | -646.34        |
|                                | Quadratic        | Age              | -0.031 (9.0E-4)      | <b>-1565.33</b> | -0.033 (9.0E-4)    | -644.47        |
|                                |                  | Age <sup>2</sup> | 0.001 (2.0E-4)       |                 | 0 (2.0E-4)         |                |
| Cubic                          | Age              | -0.029 (1.9E-3)  | -1565.31             | -0.028 (2.0E-3) | <b>-649.14</b>     |                |
|                                | Age <sup>2</sup> | 0.001 (2.0E-4)   |                      | 0 (2.0E-4)      |                    |                |
|                                | Age <sup>3</sup> | 0 (1.0E-4)       |                      | 0 (1.0E-4)      |                    |                |

Supplementary Table 4. Best fitting models for lobe specific cortical surface area. Beta estimates, standard errors (SE), and AIC fit statistics for linear, quadratic, and cubic models of age for left and right frontal, occipital, temporal, and parietal lobe surface area in both the unweighted and weighted PING data. The AIC of the best fitting model for each outcome is in bold.

|                                   |                  |                  | Unweighted PING Data |                 | Weighted PING Data |          |
|-----------------------------------|------------------|------------------|----------------------|-----------------|--------------------|----------|
|                                   |                  |                  | Beta (SE)            | AIC             | Beta (SE)          | AIC      |
| Left Frontal Lobe Surface Area    | Linear           | Age              | 162.8 (25.96)        | 19392.66        | 147 (26.85)        | 20311.13 |
|                                   | Quadratic        | Age              | 203.18 (25.82)       | <b>19339.26</b> | 159.3 (26.62)      | 20287.38 |
|                                   |                  | Age <sup>2</sup> | -47.55 (6.3)         |                 | -33.73 (6.61)      |          |
| Cubic                             | Age              | 112.9 (57.65)    | 19338.20             | -4.54 (60.99)   | <b>20280.52</b>    |          |
|                                   | Age <sup>2</sup> | -49.84 (6.43)    |                      | -35.35 (6.6)    |                    |          |
|                                   | Age <sup>3</sup> | 2.75 (1.57)      |                      | 4.93 (1.65)     |                    |          |
| Right Frontal Lobe Surface Area   | Linear           | Age              | 155.15 (26.37)       | 19424.74        | 137.47 (27.27)     | 20342.19 |
|                                   | Quadratic        | Age              | 195.27 (26.26)       | <b>19373.79</b> | 149.82 (27.04)     | 20319.06 |
|                                   |                  | Age <sup>2</sup> | -47.25 (6.41)        |                 | -33.84 (6.71)      |          |
| Cubic                             | Age              | 119.49 (58.67)   | 19373.71             | 6.87 (62.02)    | <b>20314.53</b>    |          |
|                                   | Age <sup>2</sup> | -49.18 (6.54)    |                      | -35.26 (6.71)   |                    |          |
|                                   | Age <sup>3</sup> | 2.31 (1.6)       |                      | 4.3 (1.68)      |                    |          |
| Left Occipital Lobe Surface Area  | Linear           | Age              | 47.67 (10.41)        | 17538.00        | 21.04 (11.04)      | 18507.05 |
|                                   | Quadratic        | Age              | 56.61 (10.55)        | <b>17523.43</b> | 24.48 (11.02)      | 18497.25 |
|                                   |                  | Age <sup>2</sup> | -10.53 (2.58)        |                 | -9.42 (2.73)       |          |
| Cubic                             | Age              | 14.71 (23.56)    | 17521.49             | -69.11 (25.15)  | <b>18482.31</b>    |          |
|                                   | Age <sup>2</sup> | -11.59 (2.63)    |                      | -10.35 (2.72)   |                    |          |
|                                   | Age <sup>3</sup> | 1.28 (0.64)      |                      | 2.82 (0.68)     |                    |          |
| Right Occipital Lobe Surface Area | Linear           | Age              | 35.89 (10.84)        | 17620.73        | 14.27 (11.2)       | 18536.86 |
|                                   | Quadratic        | Age              | 46.52 (10.97)        | <b>17601.11</b> | 17.83 (11.18)      | 18526.59 |
|                                   |                  | Age <sup>2</sup> | -12.51 (2.68)        |                 | -9.75 (2.77)       |          |
| Cubic                             | Age              | 4.91 (24.48)     | 17599.51             | -80.89 (25.5)   | <b>18510.28</b>    |          |
|                                   | Age <sup>2</sup> | -13.57 (2.73)    |                      | -10.73 (2.76)   |                    |          |
|                                   | Age <sup>3</sup> | 1.27 (0.67)      |                      | 2.97 (0.69)     |                    |          |
| Left Temporal Lobe Surface Area   | Linear           | Age              | 81.85 (15.03)        | 18283.06        | 52.59 (14.62)      | 19076.56 |
|                                   | Quadratic        | Age              | 106.67 (14.89)       | <b>18222.37</b> | 62.05 (14.31)      | 19026.50 |
|                                   |                  | Age <sup>2</sup> | -29.23 (3.63)        |                 | -25.94 (3.55)      |          |
| Cubic                             | Age              | 60.43 (33.26)    | 18221.96             | -38.81 (32.73)  | <b>19016.86</b>    |          |
|                                   | Age <sup>2</sup> | -30.4 (3.71)     |                      | -26.94 (3.54)   |                    |          |
|                                   | Age <sup>3</sup> | 1.41 (0.91)      |                      | 3.03 (0.89)     |                    |          |
| Right Temporal Lobe Surface Area  | Linear           | Age              | 91.52 (14.26)        | 18176.85        | 73.07 (13.61)      | 18931.83 |
|                                   | Quadratic        | Age              | 113.26 (14.2)        | <b>18125.69</b> | 81.47 (13.35)      | 18886.64 |
|                                   |                  | Age <sup>2</sup> | -25.6 (3.47)         |                 | -23.03 (3.31)      |          |
| Cubic                             | Age              | 76.09 (31.73)    | 18125.97             | -8.24 (30.56)   | <b>18878.07</b>    |          |
|                                   | Age <sup>2</sup> | -26.55 (3.54)    |                      | -23.91 (3.31)   |                    |          |
|                                   | Age <sup>3</sup> | 1.13 (0.87)      |                      | 2.7 (0.83)      |                    |          |
| Left Parietal Lobe Surface Area   | Linear           | Age              | 10.87 (20.88)        | 18950.88        | -34.78 (20.27)     | 19739.81 |
|                                   | Quadratic        | Age              | 39.15 (20.91)        | 18911.17        | -25.78 (20.11)     | 19717.62 |
|                                   |                  | Age <sup>2</sup> | -33.3 (5.1)          |                 | -24.68 (4.99)      |          |
| Cubic                             | Age              | -53.9 (46.64)    | <b>18908.21</b>      | -192.61 (45.9)  | <b>19703.46</b>    |          |
|                                   | Age <sup>2</sup> | -35.66 (5.2)     |                      | -26.33 (4.97)   |                    |          |
|                                   | Age <sup>3</sup> | 2.84 (1.27)      |                      | 5.02 (1.24)     |                    |          |
| Right Parietal Lobe Surface Area  | Linear           | Age              | 14.36 (21.84)        | 19042.56        | -35.42 (21.48)     | 19858.34 |
|                                   | Quadratic        | Age              | 45.49 (21.82)        | 18998.27        | -25.62 (21.3)      | 19834.83 |
|                                   |                  | Age <sup>2</sup> | -36.66 (5.33)        |                 | -26.87 (5.29)      |          |
| Cubic                             | Age              | -63.68 (48.66)   | <b>18993.99</b>      | -221.68 (48.53) | <b>19816.90</b>    |          |
|                                   | Age <sup>2</sup> | -39.43 (5.42)    |                      | -28.8 (5.25)    |                    |          |
|                                   | Age <sup>3</sup> | 3.33 (1.33)      |                      | 5.9 (1.32)      |                    |          |

Supplementary Table 5. Best fitting models for subcortical regions. Beta estimates, standard errors (SE), and AIC fit statistics for linear, quadratic, and cubic models of age for total bilateral amygdala, hippocampal and basal ganglia volume in both the unweighted and weighted PING data. The AIC of the best fitting model for each outcome is in bold.

|                                  |           |                  | Unweighted PING Data |                 | Weighted PING Data |                 |
|----------------------------------|-----------|------------------|----------------------|-----------------|--------------------|-----------------|
|                                  |           |                  | Beta (SE)            | AIC             | Beta (SE)          | AIC             |
| Amygdala Volume (bilateral)      | Linear    | Age              | 40.28 (4.41)         | 15783.63        | 33.38 (4.7)        | 16772.94        |
|                                  | Quadratic | Age              | 45.77 (4.45)         | <b>15755.70</b> | 36 (4.65)          | 16742.13        |
|                                  |           | Age <sup>2</sup> | -6.01 (1.09)         |                 | -6.69 (1.16)       |                 |
| Cubic                            | Cubic     | Age              | 30.15 (9.87)         | 15754.57        | -4.23 (10.58)      | <b>16726.44</b> |
|                                  |           | Age <sup>2</sup> | -6.41 (1.11)         |                 | -7.1 (1.15)        |                 |
|                                  |           | Age <sup>3</sup> | 0.48 (0.27)          |                 | 1.21 (0.29)        |                 |
| Basal Ganglia Volume (bilateral) | Linear    | Age              | 121.6 (17.05)        | 18529.90        | 99.86 (17.09)      | 19391.93        |
|                                  | Quadratic | Age              | 143.18 (17.22)       | <b>18500.98</b> | 111.4 (16.76)      | 19345.27        |
|                                  |           | Age <sup>2</sup> | -23.62 (4.22)        |                 | -29.48 (4.18)      |                 |
| Cubic                            | Cubic     | Age              | 129.59 (38.22)       | 18502.82        | -49.11 (38.06)     | <b>19325.55</b> |
|                                  |           | Age <sup>2</sup> | -23.97 (4.3)         |                 | -31.14 (4.15)      |                 |
|                                  |           | Age <sup>3</sup> | 0.41 (1.04)          |                 | 4.83 (1.03)        |                 |
| Hippocampus Volume (bilateral)   | Linear    | Age              | 39.62 (4.89)         | 15994.46        | 33.7 (5.07)        | 16924.35        |
|                                  | Quadratic | Age              | 43.75 (4.98)         | <b>15982.86</b> | 34.76 (5.08)       | <b>16921.81</b> |
|                                  |           | Age <sup>2</sup> | -4.51 (1.22)         |                 | -2.7 (1.27)        |                 |
| Cubic                            | Cubic     | Age              | 31.22 (11.05)        | 15983.25        | 18.79 (11.65)      | 16921.49        |
|                                  |           | Age <sup>2</sup> | -4.83 (1.24)         |                 | -2.86 (1.27)       |                 |
|                                  |           | Age <sup>3</sup> | 0.38 (0.3)           |                 | 0.48 (0.32)        |                 |

Supplementary Table 6. Best fitting model for intracranial subcortical volume. Beta estimates, standard errors (SE), and AIC fit statistics for linear, quadratic, and cubic models of age for subcortical intracranial volume in both the unweighted and weighted PING data. The AIC of the best fitting model for each outcome is in bold.

| <b>Intracranial Volume</b> |           |                  |                             |                 |                           |                 |
|----------------------------|-----------|------------------|-----------------------------|-----------------|---------------------------|-----------------|
|                            |           |                  | <b>Unweighted PING Data</b> |                 | <b>Weighted PING Data</b> |                 |
|                            |           |                  | <b>Beta (SE)</b>            | <b>AIC</b>      | <b>Beta (SE)</b>          | <b>AIC</b>      |
| Intracranial<br>Volume     | Linear    | Age              | 4991.99 (1491.81)           | 27616.95        | 2871.19 (1538.72)         | 28529.25        |
|                            | Quadratic | Age              | 6537.27 (1506.86)           | <b>27594.76</b> | 3376.92 (1535.08)         | <b>28518.09</b> |
|                            |           | Age <sup>2</sup> | -1819.79 (367.79)           |                 | -1386.07 (380.85)         |                 |
|                            | Cubic     | Age              | 5783.04 (3369.7)            | 27596.70        | 167.39 (3529.96)          | 28519.07        |
|                            |           | Age <sup>2</sup> | -1838.95 (375.66)           |                 | -1417.8 (381.95)          |                 |
|                            |           | Age <sup>3</sup> | 22.99 (91.89)               |                 | 96.56 (95.64)             |                 |
